# Taking Account of Asymptomatic Infections – A Modeling Study on the COVID-19 Outbreak on the Diamond Princess Cruise Ship

Li-Shan Huang<sup>1</sup>, Li Li<sup>2</sup>, Lucia Dunn<sup>3</sup>, Mai He<sup>4</sup>

1. Institute of Statistics, National Tsing Hua University, Hsinchu, 30013, Taiwan (Corresponding Author)

2. AT&T, Bedminster, NJ 07921, USA

3. Department of Economics, The Ohio State University, Columbus, OH 43210, USA

4. Department of Pathology and Immunology, Washington University School of Medicine in St. Louis, St. Louis, MO 63110, USA

## Abstract

**Background:** The COVID-19 outbreak on the Diamond Princess (DP) cruise ship provided empirical data to study the transmission potential of COVID-19 under quarantine with the presence of asymptomatic cases.

**Methods:** We studied the changes in  $R_0$  on the DP from January 21 to February 19, 2020 based on chain-binomial models under two scenarios: no quarantine assuming a random mixing condition, and quarantine of passengers in cabins — passengers may get infected either by an infectious case in a shared cabin or by asymptomatic crew who continued to work.

**Results:** Estimates of  $R_0$  at the beginning of the epidemic were 3.27 (95% CI, 3.02-3.54) and 3.78 (95% CI, 3.49-4.09) respectively for serial intervals of 5 and 6 days; and when quarantine started, with the reported asymptomatic ratio 0.505,  $R_0$  rose to 4.18 (95%CI, 3.86-4.52) and 4.73 (95%CI, 4.37-5.12) respectively for passengers who might be exposed to the virus due to

contacts with asymptomatic crew. The overall  $R_0$  for both crew and passengers was decreased to 2.55 (95%CI, 2.36-2.76) and 2.90 (95% CI, 2.67-3.13). Results show that the higher the asymptomatic ratio is, the more infectious contacts would happen.

**Conclusions:** We find evidence to support a US CDC report that “a high proportion of asymptomatic infections could partially explain the high attack rate among cruise ship passengers and crew.” Our study suggests that the effects of quarantine may be limited if the asymptomatic ratio is high, implying that a combination of preventive measures is needed to stop the spread of virus.

**Keywords:** Asymptomatic Infections, Binomial Models, COVID-19, Quarantine,  $R_0$

# Introduction

The COVID-19 outbreak has developed into an international public health emergency [1]. The reproductive number ( $R_0$ ) of COVID-19 is a key piece of information for understanding an epidemic. Current intervention methods focus on quarantine methods with either mitigation or suppression strategies aimed at reducing the reproduction number  $R_0$  and flattening the curve [2]. Asymptomatic infectious cases are less likely to seek medical care or to be tested and quarantined, contributing to the infectious potential of a respiratory virus [3,4]. Clinical findings have suggested that the viral load in asymptomatic patients is similar to that in symptomatic patients [5]. Evidence suggests that these asymptomatic patients can infect others before they manifest any symptoms [6-8]. In an early study [9] of cases in Wuhan, China, 200 individuals out of 240 (83%) reported no exposure to an individual with respiratory symptoms, which suggests pre-symptomatic/asymptomatic infection is common [10]. The Diamond Princess (DP) data with reported asymptomatic cases [11-13] may be considered as an “accidental” trial in an isolated environment. Based on the DP data [11-13], we estimate the  $R_0$  as a function of time, and our approaches take explicit account of possibly infectious contacts between quarantined passengers in cabins and asymptomatic crew, which has not been explored in the literature. A US CDC report states that “a high proportion of asymptomatic infections could partially explain the high attack rate among cruise ship passengers and crew [14].”

The DP [11-13], with 3,711 people (2,666 passengers and 1,045 crew members) on board as of February 5, 2020, was found to have an outbreak of COVID-19 from one traceable passenger from Hong Kong. This passenger became symptomatic on January 23 and disembarked on January 25 in Hong Kong. On February 1, six days after leaving the ship, he tested positive for SARS-CoV-2 at a Hong Kong hospital. Japanese authorities were informed

about this test result. On February 4, the authorities announced positive test results for SARS-CoV-2 for another ten people on board. The ship was quarantined by the Japanese Ministry of Health, Labour and Welfare for what was expected to be a 14-day period, off the Port of Yokohama [12]. Initially, passengers were quarantined in their cabins while the crew continued to work. Only symptomatic cases and close contacts were tested for COVID-19 and PCR-confirmed positive passengers were removed and isolated in Japanese hospitals. As reported, phased attempts were made to test all passengers including asymptomatic cases starting on February 11. As of February 20, 619 cases had been confirmed (16.7 % of the population on board), including 82 crew and 537 passengers [11]; and 50.5% of the COVID-19 cases on the DP were asymptomatic [13], while an estimated proportion 17.9% (95% credible interval: 15.5–20.2%) never demonstrated any symptoms, based on a Bayesian modeling approach [13]. Overall, 712 (19.2%) of the crew and passengers tested positive [14].

The  $R_0$  of COVID-19 on DP has been estimated previously [15]; this research identified the  $R_0$  as 14.8 initially and then declining to a stable 1.78 after the quarantine and removal interventions, assuming a 70% reduction in contact rate. That research does not take account of asymptomatic cases. Other researchers using the DP data up to February 16 have estimated the median  $R_0$  as 2.28 [16]. They found  $R_0$  remained high despite quarantine measures, while concluding that estimating  $R_0$  was challenging due to the difficulty in identifying the exact number of infected cases. The  $R_0$  values have important implications for predicting the effects of interventions. The threshold for combined vaccine efficacy and herd immunity needed for disease extinction is  $1 - 1/R_0$ . At  $R_0=2$ , the threshold is 50%, while at  $R_0=4$ , this threshold increases to 75%.

We investigated the changes in  $R_0$  for COVID-19 on the DP from January 21 to February

19 with a chain-binomial model at different times under two scenarios: no quarantine assuming a random mixing condition, and quarantine of passengers in cabins — passengers may get infected either by an infectious case in a shared cabin or by asymptomatic crew who continued to work. This work adds to the growing knowledge gained from the DP data in that we estimate  $R_0$  by (1) mimicking the quarantine conditions in practice, and (2) taking explicit account of the presence of the asymptomatic crew and phased removal of infectious cases.

## Materials and Methods

### *Data*

We collected publicly available data on the outbreak on the DP from January 21 to February 19 [11-13]. We set January 21 as day 1, since January 20 was the start date (day 0) of the cruise. February 19 (day 30) was the date that most passengers were allowed to leave the ship. For those dates that  $Y$ , the number of new COVID-19 cases, was not reported, linear interpolation was used. As an example, there were 67 new cases on February 15, but no data were reported on February 14. After linear interpolation,  $Y$  on a daily basis became 33 and 34 for February 14 and 15 respectively. Based on the documented onset dates [11], there were 34 cases with onset dates before February 6, and we further adjusted the number of confirmed cases on February 3, 6, and 7, from 10, 10, and 41 cases to 17, 17, and 27 cases respectively. We chose serial intervals  $\tau$  of 5 and 6 days as these are factors of 30 and are close to 7.5 days (95% CI 5.3-19) [9] and 4 days [17,18]. Then daily data were aggregated into 5- and 6-day intervals.

## Statistical Analysis

The chain-binomial model originally proposed in [19], belongs to the broader class of stochastic discrete-time SIR models [20]. The model assumes that an epidemic is formed from a succession of generations of infectious individuals from a binomial distribution. For the DP data, the initial population size is  $N_{t=0} = 3711$ , where time  $t$  is the duration measured in units of the serial interval. To model the dynamics on the ship for the case  $\tau = 6$ , we make the following assumptions, which are stated in the order of time.

- (a) From January 21 to 26 ( $t = 1$ , the first serial interval), infection contacts happened at random following the random mixing assumption. Let  $I_t$  be the number of persons infected at time  $t$ . Then  $I_{t=1}$  is a binomial random variable  $B(N_{t=0}, p_1)$  with binomial transmission probability  $p_1 = 1 - \exp(-\beta \times I_{t=0}/N_{t=0})$ , where  $\beta$  is the transmission rate and  $I_{t=0} = 1$  (the first case who disembarked on January 25). As in the SIR model, the probability that a subject escapes infectious contact is assumed to be  $\exp(-\beta \times I_{t=0}/N_{t=0})$ .
- (b) From January 27 to February 1 ( $t = 2$ ), infection contacts again followed the random mixing assumption. Hence  $I_{t=2}$  is a binomial random variable  $B(N_{t=1}, p_2)$  with  $p_2 = 1 - \exp(-\beta \times I_{t=1}/N_{t=0})$ , and the number of persons at risk of infection is  $N_{t=1} = 3711 - I_{t=1}$ .
- (c) For the period February 2 to 7 ( $t = 3$ ),  $I_{t=3}$  is a binomial random variable  $B(N_{t=2}, p_3)$  with  $N_{t=2} = N_{t=1} - I_{t=2}$  and  $p_3 = 1 - \exp(-\beta \times (I_{t=1} + I_{t=2})/N_{t=0})$ . As the quarantine started on February 5 and confirmed cases were removed, the number of persons infected, removed, and at risk of infection at the end of the  $t=3$  period were  $I_{t=3}$ ,  $(I_{t=1} + I_{t=2})$ , and  $N_{t=3} = N_{t=2} - I_{t=3}$  respectively.

(d) For  $t = 4$  and  $t = 5$  during the quarantine of passengers,  $N_t = N_{t-1} - I_t$ , and infectious cases were removed. We further make the following assumptions. (i) Of all infected cases, 86.8%(=537/619) were passengers and 13.2% (=82/619) crew [11]. We use these proportions to calculate the number of infected persons in each group,  $I_{p,t}$  and  $I_{c,t}$ , respectively, and  $I_t = I_{p,t} + I_{c,t}$ . This assumption is imposed since there is no public data available for the time course of  $I_{p,t}$  and  $I_{c,t}$ . (ii) Crew members continued to work unless showing symptoms; hence the binomial transmission probability of crew remained the same as  $1 - \exp(-\beta \times I_{t-1}/N_{t-1})$ ,  $t = 4$  and  $5$ . In other words, crew were randomly mixing in the population on board. (iii) Passengers stayed in cabins most of the time. Assume that among infected passengers  $I_{p,t}$ , the proportion of infections that occurred in cabins is  $r_p$ , and that the average occupancy per cabin is 2. For those  $I_{p,t-1}$  cases,  $t = 4, 5$ , the binomial transmission probability to infect  $I_{p,t} \times r_p$  passengers in cabins is  $1 - \exp(-\beta/2)$ . In [11],  $r_p = 0.2$  (= 23/115), while we assume  $r_p = 0.2$  and  $0.3$  when  $\tau = 6$ . For this assumption,  $r_p \leq I_{p,t-1}/I_{p,t}$ , and thus  $r_p$  cannot be made arbitrarily large. (iv) The other  $(1 - r_p)$  proportion of infected passengers' cases was possibly due to asymptomatic crew members who continued to perform service [11], and their binomial transmission probability is assumed to be  $p_t = 1 - \exp(-\beta \times aratio \times I_{c,t-1}/C_{t-1})$ , where *aratio* is the asymptomatic ratio and  $C_{t-1}$  is the number of crew members on board at time  $t - 1$ . That is to say, these passengers were randomly mixing in the crew population with possible infectious contact with asymptomatic crew. In our calculations, *aratio* = 0.4, 0.465 [14], 0.505 [13], and 0.6.

Assumptions (a)–(c) correspond to no quarantine assuming a random mixing condition, and assumption (d) to quarantine of passengers in cabins in which passengers may either get

infected (d)(iii) by an infectious case in a shared cabin or (d)(iv) by asymptomatic crew who continued to work. The maximum likelihood (ML) approach was used to estimate  $\beta$ . We developed some R code [20] by modifying some R-functions in [21] for the chain-binomial model and the ML step was carried out using the R-package bbmle [22]. The associated R-code is provided in the eAppendix. For  $t = 4, 5$ ,  $R_0$  is the number of persons (passengers or crew) at risk (at time  $t$ ) times either (d)(iv)  $1 - \exp(-\beta \times aratio/C_{t-1})$  for passengers potentially infected by asymptomatic crew, or (d)(ii)  $1 - \exp(-\beta/N_{t-1})$  for crew.

The calculation for the case  $\tau = 5$  is analogous: period January 21 to 25 follows (a); period January 26 to 30 follows (b); period January 31 to February 4 follows (c); and periods February 5 to 9, February 10 to 14, and February 15 to 19 follow (d), and  $r_p = 0.2$ , which is the maximum value given the constraint  $r_p \leq I_{p,t-1}/I_{p,t}$ .

## Results

For the DP COVID-19 outbreak, Table 1 gives the estimates of  $\beta$  and their 95% confidence intervals. Since  $\beta$  is the basic reproductive number  $R_0$  at the beginning of the epidemic ( $t = 1, 2, 3$  when  $\tau = 5$ , and  $t = 1, 2$  when  $\tau = 6$ ), we observe from Table 1 that the estimated  $R_0$  for the initial period is greater than 3 in every one of the scenarios that we considered. In addition, given  $\tau$  and  $r_p$ , the estimated  $\beta$  increases as *aratio* decreases. Thus if the *aratio* is smaller than 40%, the estimated  $\beta$  would be larger than those in Table 1.

When *aratio*=0.505 [13], the estimated  $R_0$  as a function of  $t$  and its 95% CI are given in Table 2 and illustrated in Figure 1 for the case of  $r_p = 0.2$ . We observe that when  $\tau=6$  and  $r_p=0.2$ , the  $R_0$  for passengers in (d)(iv) is increased from 3.78 at  $t=3$  to 4.73 and 4.39 at  $t = 4, 5$ ,



respectively, and the  $R_0$  is decreased to 1.06 and 1.05 respectively for crew in (d)(ii). This shows that  $R_0$  for some passengers increased from  $t = 3$  to  $t = 4, 5$  if they were in contact with asymptomatic crew members. On the other hand, the  $R_0$  for crew at  $t = 4, 5$  is small and close to 1, since infected passengers were removed and crew were exposed to fewer cases. With a higher  $r_p = 0.3$ , the same  $\tau = 6$  and  $aratio = 0.505$ , the estimated  $\beta = 4.20$  (Table 1) is larger than the case with  $r_p = 0.2$ , and the  $R_0$  for passengers in (d)(iv) is increased to 5.26 and 4.88 at  $t = 4$  and 5 respectively (Table 2); and the  $R_0$  for crew in (d)(ii) is decreased to 1.18 and 1.17 respectively. For the case of  $\tau = 5$ ,  $r_p = 0.2$ ,  $aratio = 0.505$ , and estimated  $\beta = 3.27$  (Table 1 and Figure 1), Table 2 shows that the  $R_0$  for passengers in (d)(iv) is again increased to 4.18, 4.08, and 3.74 at  $t = 4, 5$ , and 6 respectively, and the  $R_0$  for crew in (d)(ii) is below 1, 0.92, 0.92, and 0.91 respectively.

Other than those infections between passengers sharing the same cabin, the combined  $R_0$  for passengers and crew are also given in Table 2, 2.90 and 2.73 respectively for  $t = 4$  and 5 when  $\tau = 6$ ,  $r_p = 0.2$ , and  $aratio = 0.505$ , decreasing from the initial  $R_0 = 3.78$ , which illustrates the limited effects of quarantine if asymptomatic cases were present. Similarly, when  $\tau = 5$ ,  $r_p = 0.2$ , and  $aratio = 0.505$ , the combined  $R_0$  for passengers and crew is 2.55, 2.50, and 2.32 respectively for  $t = 4, 5$  and 6. To understand the dynamics of no quarantine with a high  $R_0$ , Figure 2 shows 100 stochastic simulations of the chain binomial model based on  $N = 3,700$  and  $\beta = 3.78$ , assuming no quarantine, infected cases removed,  $\tau = 6$ , and extrapolation to 90 days, with the observed epidemic (red line). It suggests that the quarantine on DP did prevent a more serious outbreak. If there was no quarantine, the cumulative number of cases at the end of 30 days has a mean 855 (SD = 439), and median 791 (IQR = 533), while the observed DP data of 621 cases [11] is at the 35th percentile. Among 99 of 100 simulations, the entire population is

infected at the end of 54 days, and in the remaining one simulation, the entire population is immune, not infected at all.

Let us explain mathematically why the  $R_0$  increased for passengers in contact with asymptomatic crew. Denote the number of passengers in assumption (d)(iv) as  $Pa_t$ . To reduce their  $R_0$  to a number smaller than the initial  $\beta$ , a sufficient condition is  $aratio \leq C_{t-1}/Pa_t$ , and the DP crew-passenger ratio at  $t=0$  is  $1045/2666=0.39$  [12]. This suggests that as long as the *aratio* is  $\geq 40\%$ ,  $R_0$  for passengers in (d)(iv) would remain high due to asymptomatic crew. The higher the *aratio* is, the more infectious contacts would happen. Thus, for a virus with a high *aratio*, the conventional quarantine procedure may not be effective to stop the spread of virus, highlighting the importance of early and effective surveillance.

We then derived a sufficient condition to achieve  $R_0 \leq 1$  for both passengers and crew:  $\beta \times aratio \times Pa_t \leq C_{t-1}$  and  $C_t \leq N_{t-1}/\beta$ . We attempt to interpret this condition as follows. For a  $\beta$  about 3,  $C_t \leq N_{t-1}/\beta$  means that the number of people who continued to work during quarantine is less than one-third of the population, which is generally the case during quarantine. However,  $\beta \times aratio \times Pa_t \leq C_{t-1}$  may not be satisfied depending on the *aratio* value. When the *aratio* is close to 0, this condition is satisfied, but when *aratio* is high, the asymptomatic crew continue to spread the virus and passengers staying in cabins could not escape infectious contacts. This suggests that if the true *aratio* value is high, the current “stay-at-home” quarantine procedure may not be sufficient to reduce  $R_0 \leq 1$  and to eliminate the virus completely.

## Discussion

The effects of pre/asymptomatic population on the spread of COVID-19 during quarantine has not yet been studied extensively. Clinical observations and lab tests have

confirmed the existence of a pre/asymptomatic population infecting others [6-8]. It is not easy to give estimates of the size of this population, yet the DP outbreak provides useful real world data for this. 50.5% of passengers and crew members on the DP were asymptomatic and an estimated 17.9% of the infected individuals never demonstrated any symptoms [13].

In this study, the estimated  $R_0$  for the initial period (Table 1) are all greater than 3, consistent with most estimates of  $R_0$  reported earlier, showing that the COVID-19 virus is highly contagious [23,24]. The initial  $R_0$  is also comparable to those estimated in other non-cruise settings. The novelty of our approach has been to incorporate the asymptomatic ratio in the chain-binomial model to account for the possibly infectious contacts between quarantined passengers and asymptomatic crew. The results show that with a serial interval of 6 days,  $R_0$  is similar for  $t = 1-3$ , yet  $R_0$  for some passengers in assumption (d)(iv) is higher for  $t = 4, 5$ . The results show that the observed proportions of infections, 86.8%(=537/619) for passengers and 13.2%(=82/619) for crew [11], is possible and we find evidence to support a US CDC report that “a high proportion of asymptomatic infections could partially explain the high attack rate among cruise ship passengers and crew [14].”

Some research has suggested that the pre/asymptomatic population, “silent carriers,” are the main driving force behind this pandemic. A group [25] has estimated that the proportion of undocumented infections in China — including those who experience mild, limited or no symptoms and go undiagnosed— could be as high as 86% prior to January 23, 2020. They estimated the transmission rate of undocumented infections as 55% of the rate for documented infections, and yet that undocumented infections contributed to 79% of documented cases. Another group of researchers found that the total contribution from the pre/asymptomatic population is more than that of symptomatic patients [26]. Future studies to estimate the

asymptomatic ratio and the time when asymptomatic persons become infectious are needed to evaluate the effects of various control strategies.

The strength of this analysis is that it incorporates asymptomatic infections in the DP data that might not have been explored earlier. However, there are also limitations. First, due to inadequate data on the time course of infection cases among crew and passengers, assumption (d)(i) assumes a constant proportion, which may vary with time in practice. Second, the values of the parameter  $r_p$  assumed in the present study may not be sufficiently large. Third, the assumptions (a)-(d) under chain-binomial models may not be sufficient to capture the complexity of the COVID-19 epidemics. Fuller data reporting is important for researchers to develop statistical methodology to help combat this pandemic.

Almost all of the passengers on DP were tested before they were evacuated. However, it is impractical to test everyone in the real world, especially for those asymptomatic cases. On DP, crew members continued to perform service unless they showed symptoms. This provides a parallel to people doing “essential work” in society and thus exempt from shelter-in-place rules. Our study suggests that if the asymptomatic ratio is high, the conventional quarantine might not be sufficient to reduce  $R_0$  to below 1, implying that a combination of preventive measures is needed to stop the spread of virus. When DP was docked in Taiwan for a 1-day tour on January 31, 2020, “big data analytics” was used to contain the spread of virus [27]. The low incidences in Taiwan strongly suggest that the virus can be contained with early and appropriate measures.

# References

1. Sahu KK, Mishra AK, Lal A. Comprehensive update on current outbreak of novel coronavirus infection (2019-nCoV). *Ann Transl Med*. 2020 Mar;8(6):393. doi: 10.21037/atm.2020.02.92. Review.
2. Ferguson N, Laydon D, Nedjati Gilani G, et al. Report 9: Impact of non-pharmaceutical interventions (NPIs) to reduce COVID19 mortality and healthcare demand. *Imperial College London*. 2020.
3. Munster VJ, Koopmans M, van Doremalen N, van Riel D, de Wit E. A novel coronavirus emerging in China — key questions for impact assessment. *N Engl J Med* 2020;382(8):692–694. doi: 10.1056/NEJMp2000929.
4. Li R, Pei S, Chen B, et al. Substantial undocumented infection facilitates the rapid dissemination of novel coronavirus (SARS-CoV2). *Science* 2020:eabb3221. doi: 10.1126/science.abb3221.
5. Zou L, Ruan F, Huang M, et al. SARS-CoV-2 Viral load in upper respiratory specimens of infected patients. *N Engl J Med* 2020;382(12):1177-1179. doi: 10.1056/NEJMc2001737.
6. Zhang J, Tian S, Lou J, Chen Y. Familial cluster of COVID-19 infection from an asymptomatic. *Critical Care* 2020;24(1):119. doi: 10.1186/s13054-020-2817-7.
7. Hoelscher M, Guggemos W, Vollmar P, et al. Transmission of 2019-nCoV infection from an asymptomatic contact in Germany. *N Engl J Med* 2020;382(10):970-971. doi: 10.1056/NEJMc2001468.
8. Bai Y, Yao L, Wei T, et al. Presumed asymptomatic carrier transmission of COVID-19. *JAMA* 2020. doi: 10.1001/jama.2020.2565.

9. Li Q, Guan X, Wu P, et al. Early transmission dynamics in Wuhan, China, of novel coronavirus-infected pneumonia. *N Engl J Med* 2020;382(13):1199-1207. doi: 10.1056/NEJMoa2001316.
10. Ferretti L, Wymant C, Kendall M, et al. Quantifying SARS-CoV-2 transmission suggests epidemic control with digital contact tracing. *Science* 2020:eabb6936. doi: 10.1126/science.abb6936.
11. National Institute of Infectious Disease. Field briefing: Diamond Princess COVID-19 cases, 20 Feb update. <https://www.niid.go.jp/niid/en/2019-ncov-e/9417-covid-dp-fe-02.html>. Published February 20, 2020. Accessed May 25, 2020.
12. National Institute of Infectious Disease. Field briefing: Diamond Princess COVID-19 cases. <https://www.niid.go.jp/niid/en/2019-ncov-e/9407-covid-dp-fe-01.html>. Published February 19, 2020. Accessed May 25, 2020.
13. Mizumoto K, Kagaya K, Zarebski A, Chowell G. Estimating the asymptomatic proportion of coronavirus disease 2019 (COVID-19) cases on board the Diamond Princess cruise ship, Yokohama, Japan, 2020. *Eurosurveillance* 2020;25(10). doi: 10.2807/1560-7917.ES.2020.25.10.2000180.
14. Moriarty LF, Plucinski MM, Marston BJ, et al. Public health responses to COVID-19 outbreaks on cruise ships — worldwide, February–March 2020. *Morbidity and Mortality Weekly Report* 2020;69(12). doi: 10.15585/mmwr.mm6912e3.
15. Rocklöv J, Sjödin H, Wilder-Smith A. COVID-19 outbreak on the Diamond Princess cruise ship: estimating the epidemic potential and effectiveness of public health countermeasures. *Journal of Travel Medicine* 2020. doi: 10.1093/jtm/taaa030.

16. Zhang S, Diao M, Yu W, Pei L, Lin Z, Chen D. Estimation of the reproductive number of novel coronavirus (COVID-19) and the probable outbreak size on the Diamond Princess cruise ship: a data-driven analysis. *Int J Infect Dis* 2020;93:201–204.  
doi:10.1016/j.ijid.2020.02.033.
17. Nishiura H, Linton NM, Akhmetzhanov AR. Serial interval of novel coronavirus (COVID-19) infections [published online ahead of print, 2020 Mar 4]. *Int J Infect Dis* 2020;93:284–286. doi:10.1016/j.ijid.2020.02.060.
18. Du Z, Xu X, Wu Y, Wang L, Cowling BJ, Lauren Ancel Meyers L. Serial interval of COVID-19 among publicly reported confirmed cases. *Emerg Infect Dis* 2020 Jun.  
doi:10.3201/eid2606.200357.
19. Bailey NTJ. The mathematical theory of epidemics. London: Griffin; 1957:75-108.
20. R Core Team. R: A Language and Environment for Statistical Computing. 2014.Vienna, Austria: R Foundation for Statistical Computing.
21. Bjørnstad ON. Epidemics: models and data using R. Springer; 2018.
22. Bolker B. bbmle: Tools for general maximum likelihood estimation. <https://cran.r-project.org/web/packages/bbmle/>. Published February 3, 2020. Accessed March 3, 2020.
23. Liu Y, Gayle AA, Wilder-Smith A, Rocklöv J. The reproductive number of COVID-19 is higher compared to SARS coronavirus. *J Travel Med* 2020;27(2). doi: 10.1093/jtm/taaa021.
24. Zhao S, Lin Q, Ran J, et al. Preliminary estimation of the basic reproduction number of novel coronavirus (2019-nCoV) in China, from 2019 to 2020: A data-driven analysis in the early phase of the outbreak. *Int J Infect Dis* 2020;92:214-217. doi: 10.1016/j.ijid.2020.01.050.

25. Li R, Pei S, Chen B, et al. Substantial undocumented infection facilitates the rapid dissemination of novel coronavirus (SARS-CoV2). Science 2020:eabb3221. doi: 10.1126/science.abb3221.
26. Ferretti L, Wymant C, Kendall M, et al. Quantifying SARS-CoV-2 transmission suggests epidemic control with digital contact tracing. Science 2020:eabb6936. doi: 10.1126/science.abb6936.
27. Chen, C.-M., et al. Containing COVID-19 Among 627,386 Persons in Contact With the Diamond Princess Cruise Ship Passengers Who Disembarked in Taiwan: Big Data Analytics." Journal of Medical Internet Research 22(5) (2020): e19540.



**Table 1: Estimates of  $\beta$  and their 95% confidence intervals for the Diamond Princess COVID-19 outbreak data.**

| asymptomatic ratio ( <i>aratio</i> ) | $\beta = R_0$ at $t=1, 2$ when $\tau = 6$ , at $t=1, 2, 3$ when $\tau = 5$ ; estimate (95% CI) |                       |                       |
|--------------------------------------|------------------------------------------------------------------------------------------------|-----------------------|-----------------------|
|                                      | $\tau = 6; r_p = 0.2$                                                                          | $\tau = 6; r_p = 0.3$ | $\tau = 5; r_p = 0.2$ |
| 40%                                  | 3.94 (3.64, 4.27)                                                                              | 4.41 (4.06, 4.78)     | 3.41 (3.15, 3.69)     |
| 46.50%                               | 3.84 (3.54, 4.16)                                                                              | 4.28 (3.94, 4.64)     | 3.33 (3.07, 3.60)     |
| 50.50%                               | 3.78 (3.49, 4.09)                                                                              | 4.20 (3.87, 4.55)     | 3.27 (3.02, 3.54)     |
| 60%                                  | 3.64 (3.36, 3.94)                                                                              | 4.03 (3.71, 4.36)     | 3.16 (2.91, 3.42)     |

**Table 2: Estimates of  $R_0$  as a function of  $t$  and their 95% confidence intervals for the Diamond Princess COVID-19 outbreak**

|                   |                       | $R_0$ as a function of $t$ when <i>aratio</i> =0.505; 95%CI |                     |                     |
|-------------------|-----------------------|-------------------------------------------------------------|---------------------|---------------------|
| time interval     |                       | 2/2-2/7 ( $t=3$ )                                           | 2/8-2/13 ( $t=4$ )  | 2/14-2/19 ( $t=5$ ) |
| $\tau=6; r_p=0.2$ | passengers in (d)(iv) |                                                             | 4.73 (4.37, 5.12)   | 4.39 (4.06, 4.75)   |
|                   | crew                  | 3.78 (3.49, 4.09)                                           | 1.06 (0.98, 1.15)   | 1.05 (0.97, 1.14)   |
|                   | combined              |                                                             | 2.90 (2.67, 3.13)   | 2.73 (2.52, 2.95)   |
| $\tau=6; r_p=0.3$ | passengers in (d)(iv) |                                                             | 5.26 (4.84, 5.69)   | 4.88 (4.50, 5.29)   |
|                   | crew                  | 4.20 (3.87, 4.55)                                           | 1.18 (1.08, 1.28)   | 1.17 (1.08, 1.27)   |
|                   | combined              |                                                             | 3.22 (2.97, 3.49)   | 3.03 (2.79, 3.28)   |
| time interval     |                       | 2/5-2/9 ( $t=4$ )                                           | 2/10-2/14 ( $t=5$ ) | 2/15-2/19 ( $t=6$ ) |
| $\tau=5; r_p=0.2$ | passengers in (d)(iv) | 4.18 (3.86, 4.52)                                           | 4.08 (3.77, 4.42)   | 3.74 (3.45, 4.04)   |
|                   | crew                  | 0.92 (0.85, 1.00)                                           | 0.92 (0.85, 0.99)   | 0.91 (0.84, 0.98)   |
|                   | combined              | 2.55 (2.36, 2.76)                                           | 2.50 (2.31, 2.71)   | 2.32 (2.15, 2.52)   |

## Figure legends

Figure 1: Time-dependent effective reproduction number  $R_0$  (solid lines) of COVID-19 on board the Diamond Princess ship January 21 (day 1) to February 19 (day 30) and their 95% confidence intervals, assuming  $\tau = 5$  and 6 days,  $r_p = 0.2$  and  $aratio = 0.505$ . Blue:  $R_0$  for passengers in contact with asymptomatic crew members. Red:  $R_0$  for crew members.

Figure 2: 99 of 100 stochastic simulations of the chain binomial model based on  $N = 3700$  and  $\beta = 3.78$ , assuming no quarantine, serial interval  $\tau = 6$  days, infected cases removed, and extrapolation to 90 days, with the observed epidemic (red line). For the remaining one simulation, the entire population is immune, not infected at all.

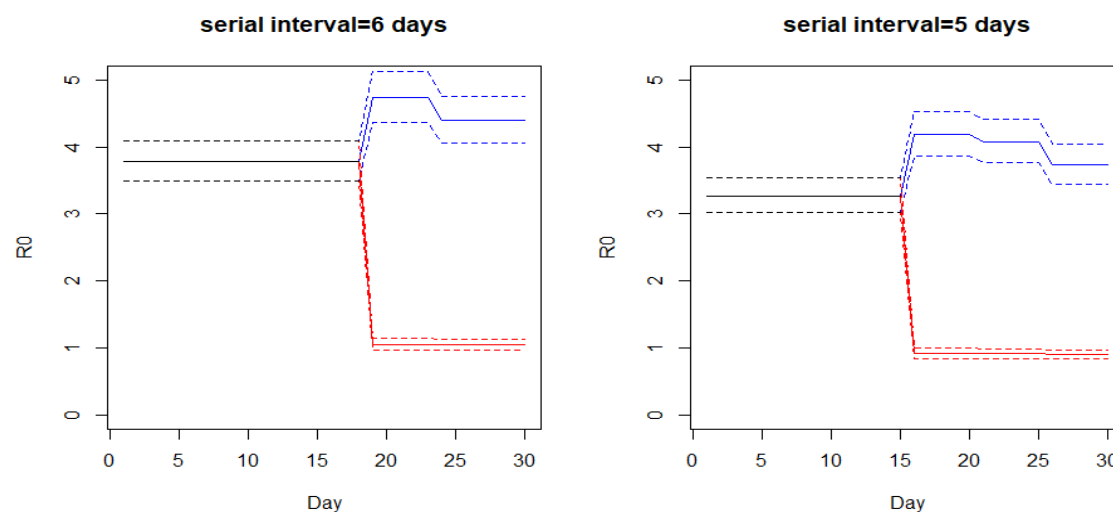

Figure 1: Time-dependent effective reproduction number  $R_0$  (solid lines) of COVID-19 on board the Diamond Princess ship January 21 (day 1) to February 19 (day 30) and their 95% confidence intervals, assuming  $\tau = 5$  and 6 days,  $r_p = 0.2$  and  $aratio = 0.505$ . **Blue**:  $R_0$  for passengers in contact with asymptomatic crew members. **Red**:  $R_0$  for crew members.

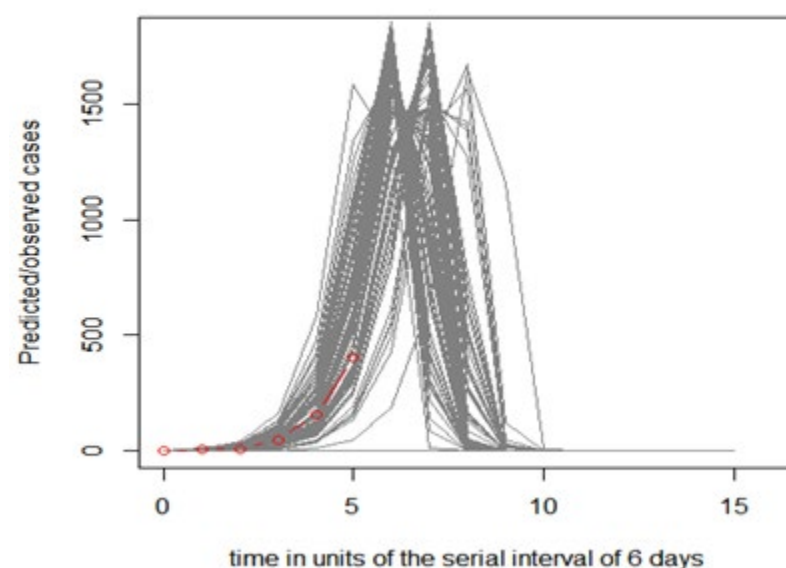

Figure 2: 99 of 100 stochastic simulations of the chain binomial model based on  $N = 3700$  and  $\beta = 3.78$ , assuming no quarantine, serial interval  $\tau = 6$  days, infected cases removed, and extrapolation to 90 days, with the observed epidemic (red line). For the remaining one simulation, the entire population is immune, not infected at all.
